# Supplementary material for: Organogels Fabricated from Self-Assembled Nanotubes Containing Core Substituted Perylene Diimide Derivative
Source: PubMed Central journal article supplement (PMC9245106; doi:10.1021/acsomega.2c02210), 2022-06-14
Supplement: ao2c02210_si_002.pdf [file ao2c02210_si_002.pdf]

**Supporting Information for:**

**Organogels fabricated from self-assembled nanotubes containing  
Core substituted Perylene diimide derivative.**

PRAJNA MOHARANA and G. SANTOSH \*

Division of Chemistry, School of Advanced Sciences, Vellore Institute of Technology,  
Chennai– 600127, INDIA

**Contents**

1.  $^1\text{H}$  NMR data
2. UV/Vis spectra in different organic solvents
3. UV/Vis vs Fluorescence spectra
4. Scanning electron microscope (SEM) image and histogram
5. Powder X-ray diffraction (PXRD) analysis
6. IR analysis
7. Concentration dependent study
8. Organogels
9. Scanning electron microscope (SEM) images of xerogels
10. Size distribution of nanostructure using histogram

## Characterization

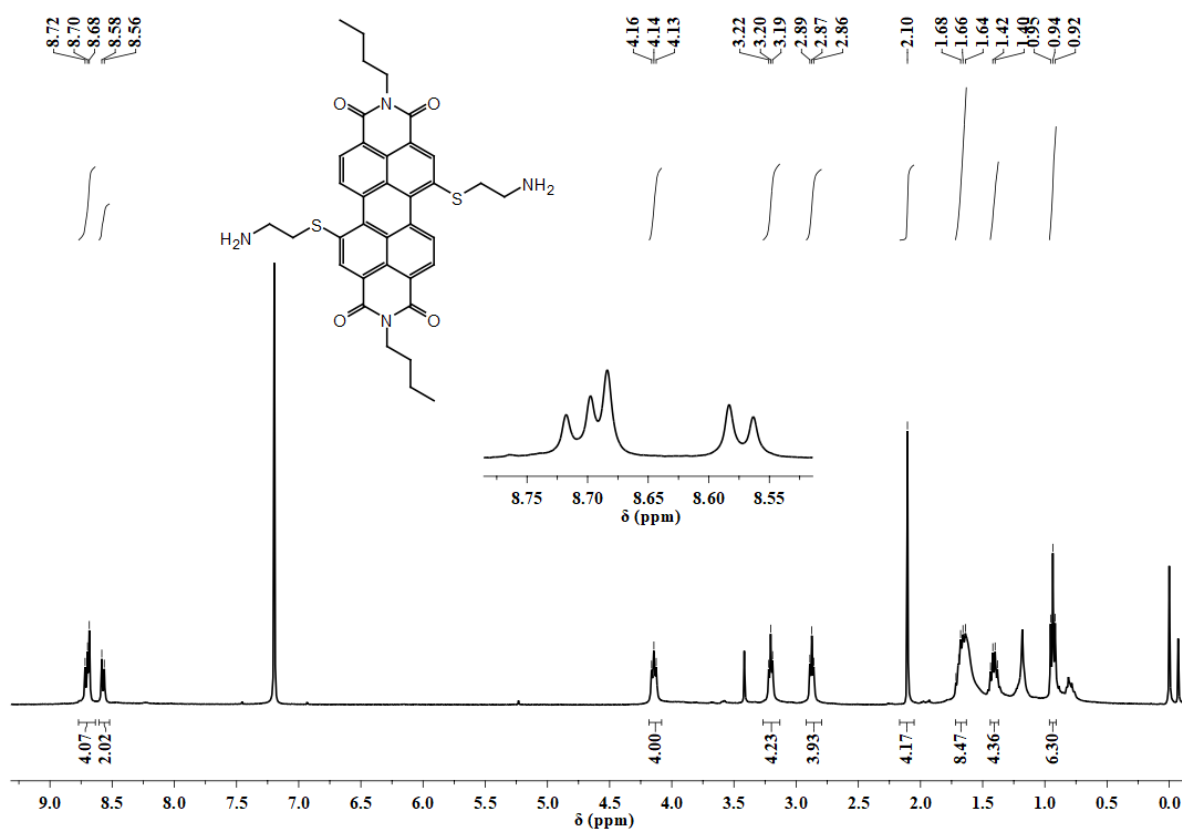

**Figure S1.** <sup>1</sup>H NMR (400 MHz, CDCl<sub>3</sub>) spectrum of cys-PDI-cys.

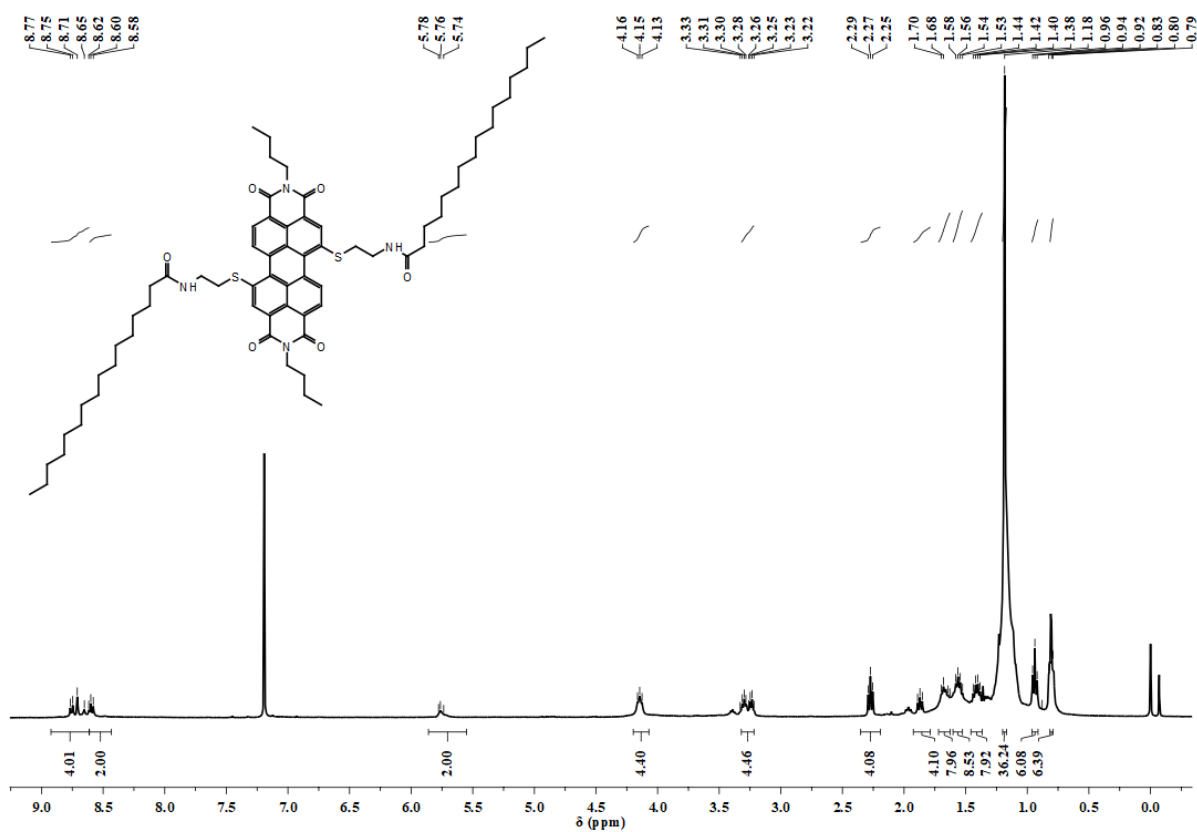

Figure S2.  $^1\text{H}$  NMR (400 MHz,  $\text{CDCl}_3$ ) spectrum of **PDI-1**.

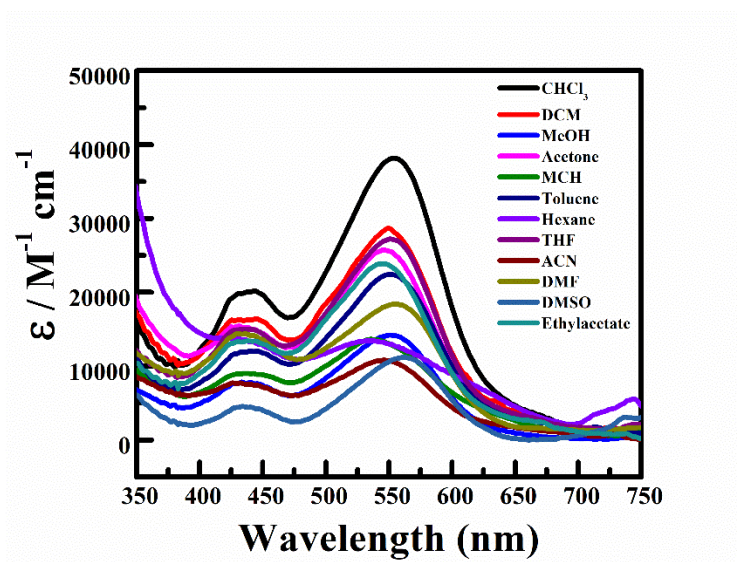

Figure S3. Absorption spectra of **PDI-1** in different organic solvents ( $5\mu\text{M}$ ).

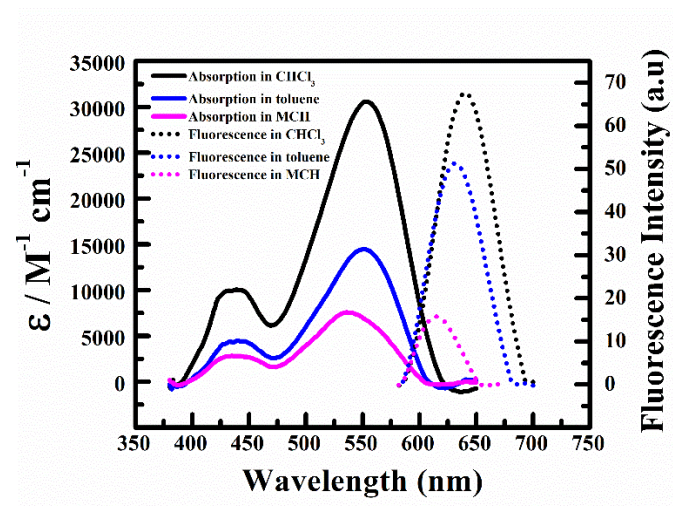

**Figure S4.** Absorption and fluorescence spectra of **PDI-1** in CHCl<sub>3</sub>, toluene and MCH (5 $\mu$ M).

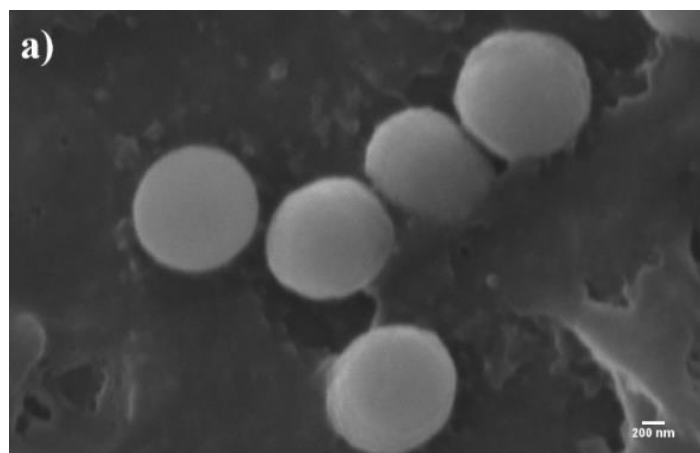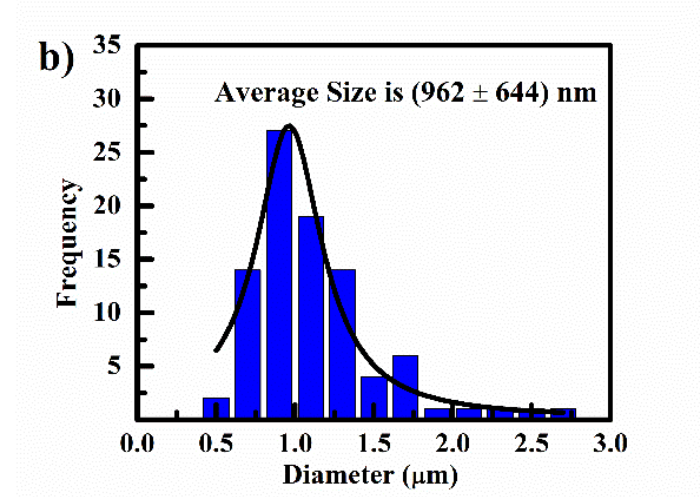

**Figure S5.** a) SEM image of **PDI-1** spherical aggregates in hexane ( $10\mu\text{M}$ ), and b) Size distribution histogram of vesicle diameter.

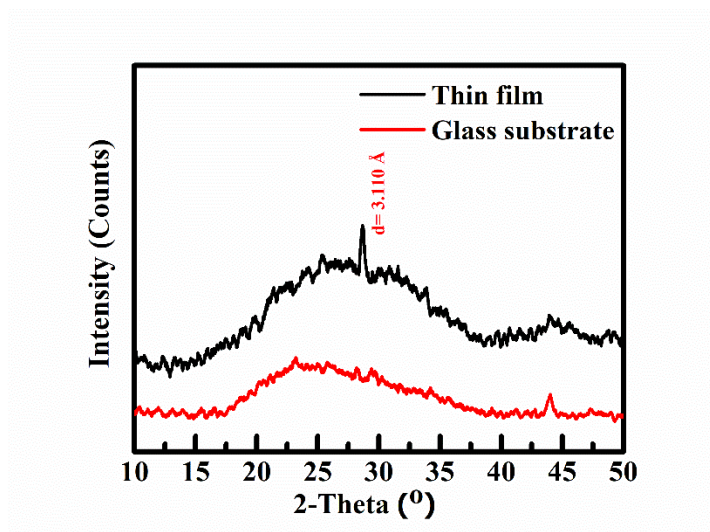

**Figure S6.** XRD patterns of spherical aggregates of **PDI-1** in hexane solution ( $10\mu\text{M}$ ).

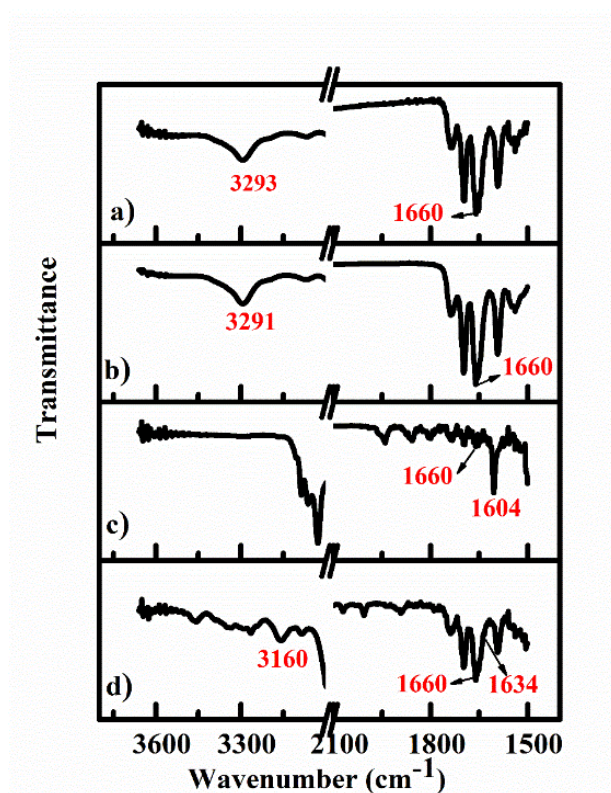

**Figure S7.** IR spectra of **PDI-1** in a) hexane and b)  $\text{CHCl}_3$ . IR spectra of organogels of c) toluene, and d) MCH.

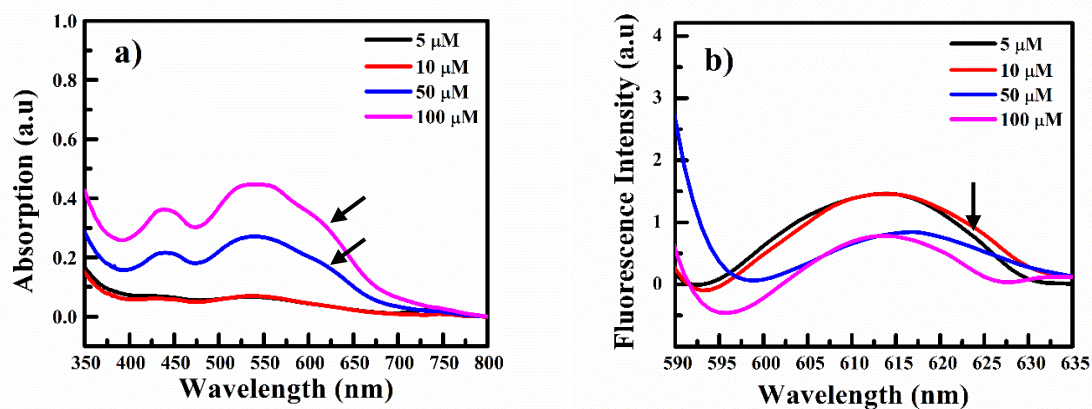

**Figure S8.** a) Absorption spectra and b) Fluorescence spectra of **PDI-1** in hexane in different concentrations ( $5\mu\text{M}$ ,  $10\mu\text{M}$ ,  $50\mu\text{M}$ , and  $100\mu\text{M}$ ).

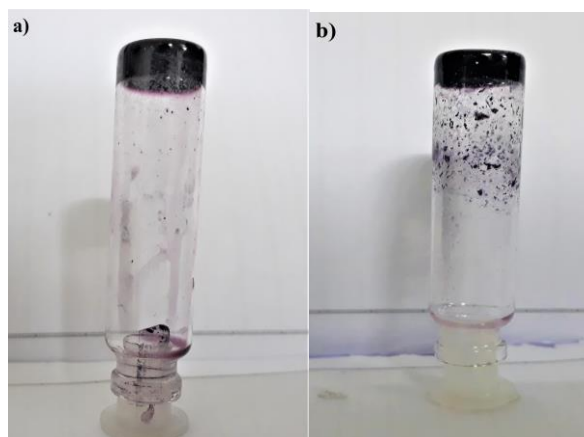

**Figure S9.** PDI-1 organogels of a) toluene and b) MCH.

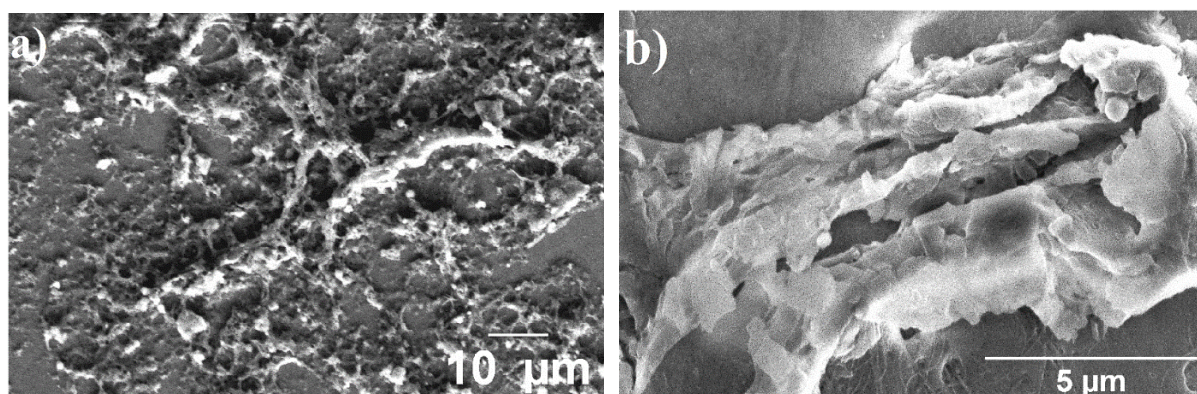

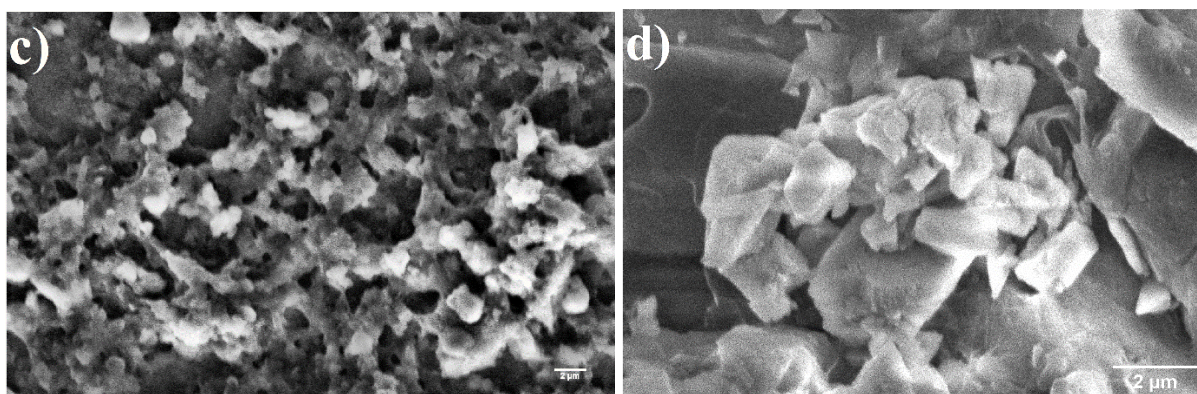

**Figure S10.** SEM images of xerogel of a) MCH, scale bar  $10\mu m$ , b) toluene, scale bar  $5\mu m$ , c) MCH, scale bar  $2\mu m$  and d) toluene, scale bar  $2\mu m$

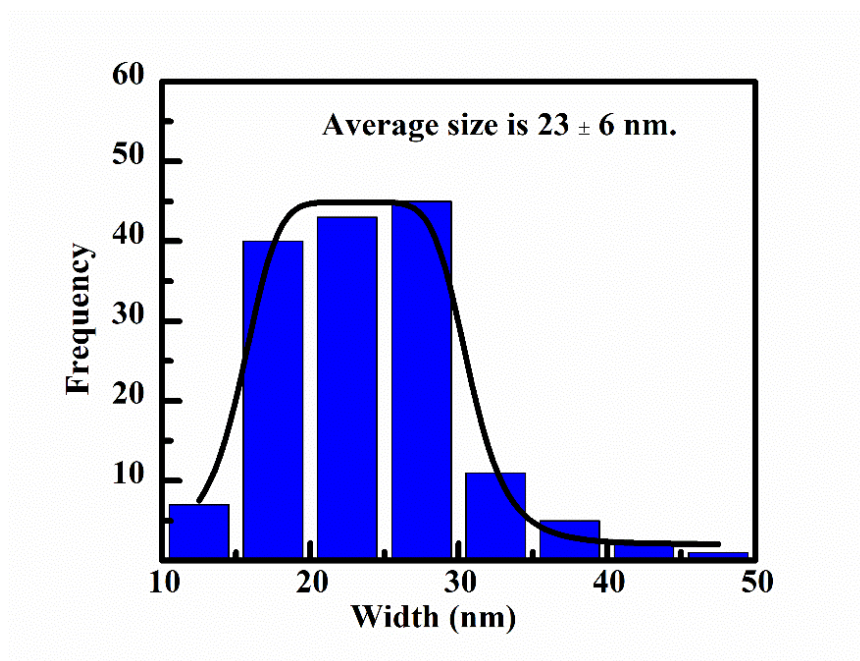

**Figure S11.** Size distribution histogram of nanotubes from toluene xerogel.

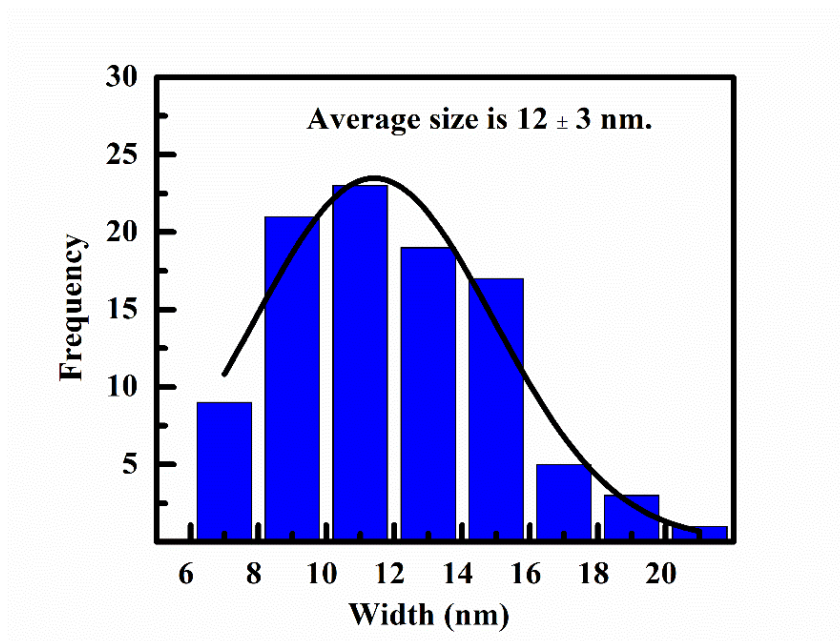

**Figure S12.** Size distribution histogram of nanofibers from MCH xerogel.
